# Supplementary material
Source: PubMed Central journal article supplement (PMC4628575)
Supplement: NIHMS686279-supplement-supplement_1.pdf [file NIHMS686279-supplement-supplement_1.pdf]

## Supplemental Table 2: List of 88 biomarkers

1. Adiponectin
2. Alpha-1-Antitrypsin
3. Alpha-2-Macroglobulin
4. Alpha-Fetoprotein
5. Apolipoprotein A-I
6. Apolipoprotein C-III
7. Apolipoprotein H
8. Apolipoprotein(a)
9. Beta-2-Microglobulin
10. Brain-Derived Neurotrophic Factor
11. C-Reactive Protein
12. Calcitonin
13. Cancer Antigen 125
14. Cancer Antigen 19-9
15. Carcinoembryonic Antigen
16. CD40 antigen
17. CD40 Ligand
18. Complement C3
19. Creatine Kinase-MB
20. EN-RAGE (Extracellular Newly-identified Receptor for Advanced Glycation End-products binding protein)
21. Endothelin-1
22. Eotaxin-1
23. Epidermal Growth Factor
24. Epithelial-Derived Neutrophil-Activating Protein 78
25. Erythropoietin
26. Factor VII
27. Fatty Acid-Binding Protein, heart
28. Ferritin
29. Fibrinogen
30. Fibroblast Growth Factor, basic
31. Granulocyte Colony-Stimulating Factor
32. Granulocyte-Macrophage Colony-Stimulating Factor
33. Growth Hormone
34. Haptoglobin
35. Immunoglobulin A
36. Immunoglobulin E
37. Immunoglobulin M
38. Insulin
39. Insulin-like Growth Factor I
40. Intercellular Adhesion Molecule 1
41. Interferon gamma
42. Interleukin-1 alpha
43. Interleukin-1 beta

44. Interleukin-1 receptor antagonist
45. Interleukin-2
46. Interleukin-3
47. Interleukin-4
48. Interleukin-5
49. Interleukin-6
50. Interleukin-7
51. Interleukin-8
52. Interleukin-10
53. Interleukin-12 Subunit p40
54. Interleukin-12 Subunit p70
55. Interleukin-13
56. Interleukin-15
57. Interleukin-16
58. Leptin
59. Lymphotoctin
60. Macrophage Inflammatory Protein-1 alpha
61. Macrophage Inflammatory Protein-1 beta
62. Macrophage-Derived Chemokine
63. Matrix Metalloproteinase-2
64. Matrix Metalloproteinase-3
65. Matrix Metalloproteinase-9
66. Monocyte Chemotactic Protein 1
67. Myeloperoxidase
68. Myoglobin
69. Plasminogen Activator Inhibitor 1
70. Pregnancy-Associated Plasma Protein A
71. Prostate-Specific Antigen, Free
72. Prostatic Acid Phosphatase
73. RANTES (Regulated on Activation, Normal T cell Expressed and Secreted; also known as chemokine (C-C motif) ligand 5)
74. Serum Amyloid P-Component
75. Serum Glutamic Oxaloacetic Transaminase
76. Sex Hormone-Binding Globulin
77. Stem Cell Factor
78. Thrombopoietin
79. Thyroid-Stimulating Hormone
80. Thyroxine-Binding Globulin
81. Tissue Factor
82. Tissue Inhibitor of Metalloproteinases 1
83. Tumor Necrosis Factor alpha
84. Tumor Necrosis Factor beta
85. Tumor Necrosis Factor Receptor-Like 2
86. Vascular Cell Adhesion Molecule-1
87. Vascular Endothelial Growth Factor
88. von Willebrand Factor
